# Supplementary material
Source: PubMed Central journal article supplement (PMC4064450)
Supplement: NIHMS59195-supplement-Supplementary_information.pdf [file NIHMS59195-supplement-Supplementary_information.pdf]

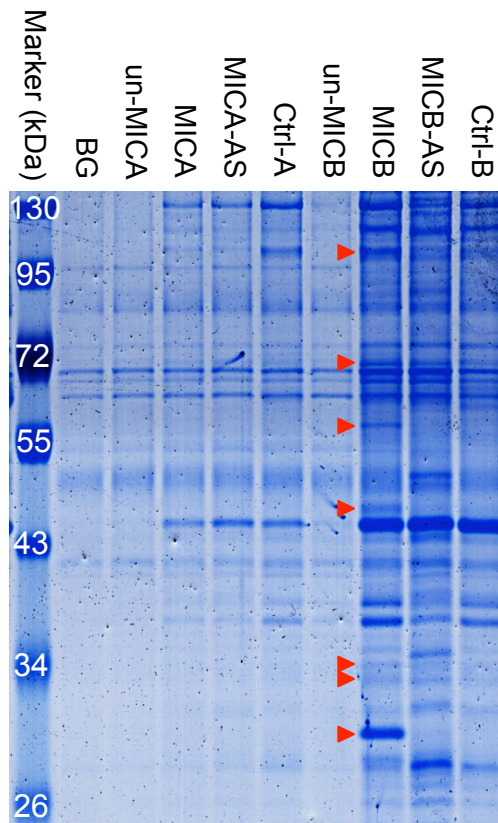

**Supplementary figure 1. RBP precipitation by the 3'UTR of MICB from HEK293T cell cytoplasmic extract**

Coomassie staining of RNA binding proteins precipitated from cytoplasmic extracts of HEK293T cells via RNA-AP. The specific bands that were cut and sent for mass spectrometry analysis are marked by red arrowheads. BG-background, stands for purification in the presence of streptavidin beads only (without a labeled RNA). Un-MICA/un-MICB stands for the 3'UTR of either MICA or MICB, which was not labeled with biotinylated UTPs. MICA/MICB stands for the 3' UTR of either MICA or MICB labeled with biotinylated UTPs. AS stands for antisense 3'UTR. Ctrl-A is the 3'UTR of TAF6. Ctrl-B is the 3'UTR of CASQ2.

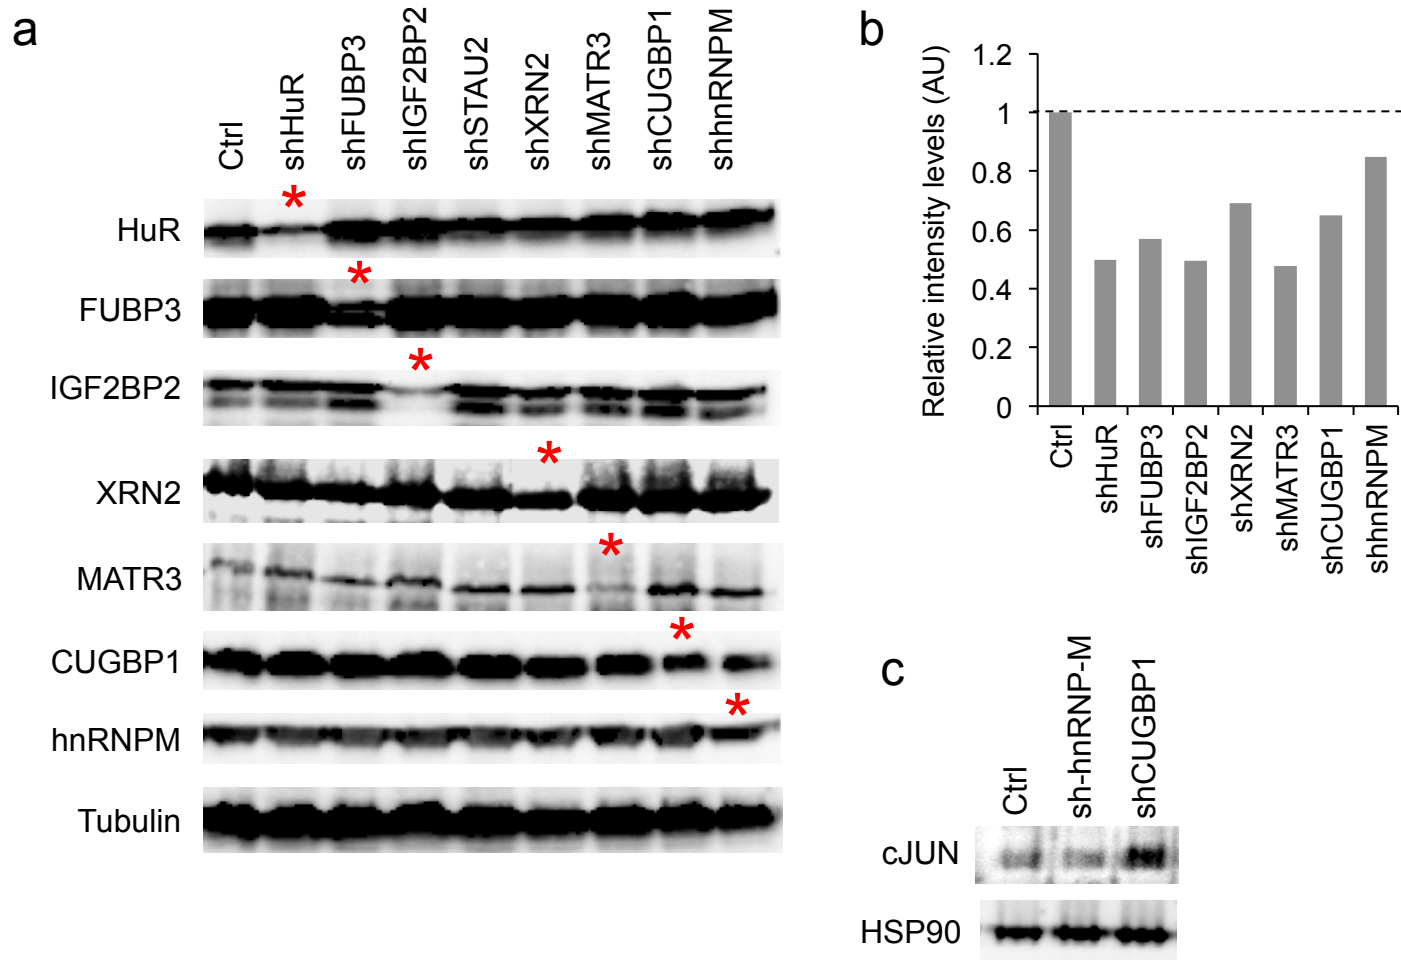

**Supplementary figure 2. Validation of KD efficiency**

(a) WB analysis of confirming the knockdown of various RBPs in RKO cells. The shRNAs are indicated above the target and the various antibodies used for the WB are indicated on the left. The specific KD is marked with a red asterisk. Tubulin served as a loading control. (b) WB analysis quantification of RBP KD efficiency relative to the control shRNA (Ctrl) that was set to 1 (marked by the dashed line). (c) WB analysis of the known target of CUGBP1, cJUN, in CUGBP1-KD cells. cJUN showed increased expression due to depletion of CUGBP1 relative to control-shRNA and sh-hnRNPM as an additional control.

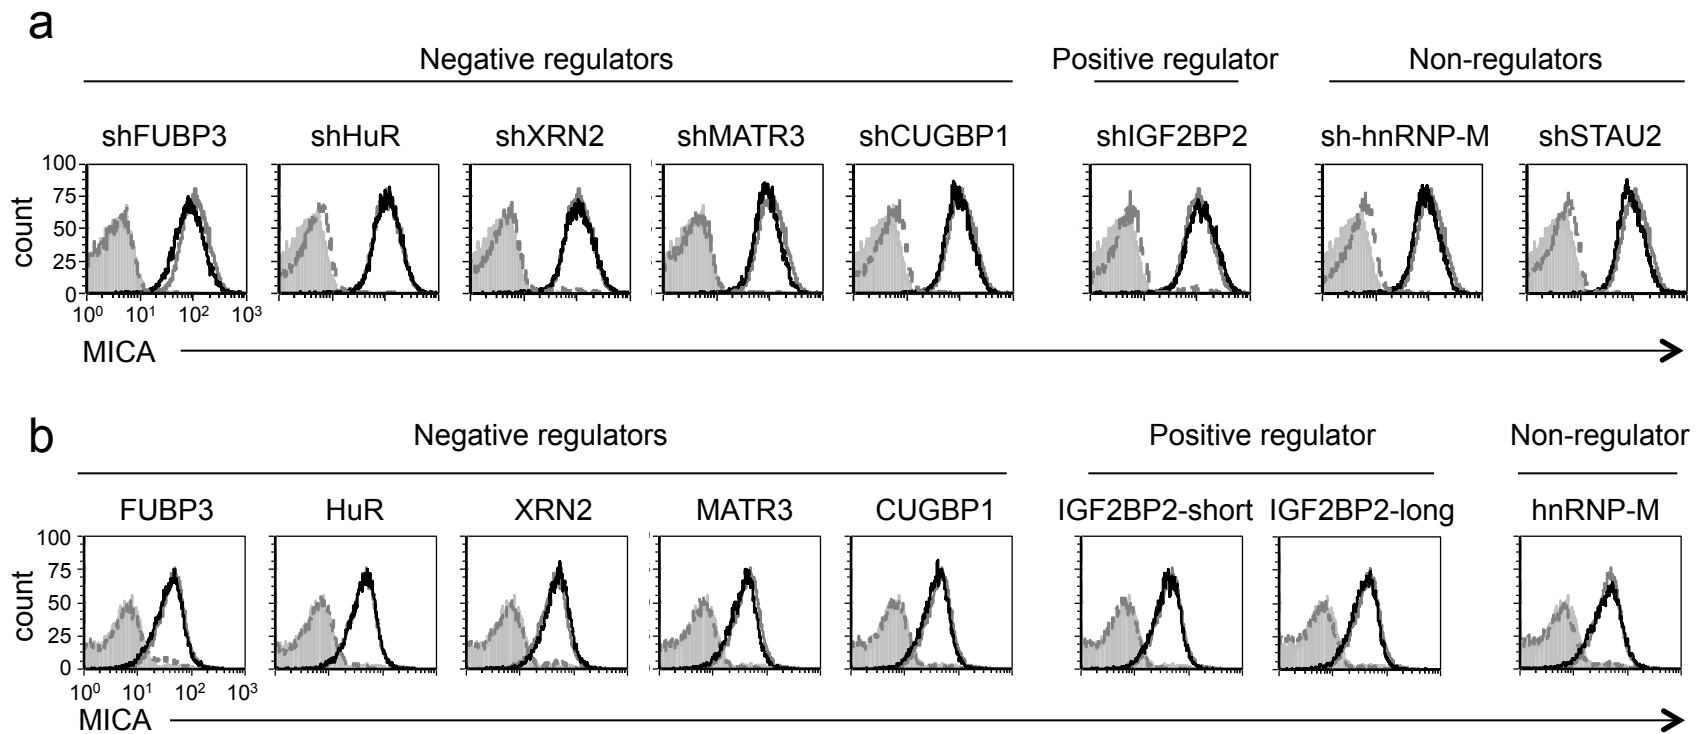

**Supplementary figure 3. The RBPs regulate specifically MICB and do not alter the expression of MICA on HEK293T cells** (a and b) FACS analysis of the expression of MICA on HEK293T cells transduced with either shRNAs against the various RBPs (a) or with lentiviral vectors expressing the various RBPs (b). The empty black histogram represents the indicated shRNA (a) or RBP (b), the empty grey histogram represents a control-shRNA (a) or STAU2 as a control RBP (b), the dashed dark grey histogram represents background of the specific cell and the filled grey histogram represents background staining. Data are representative of six independent experiments.

**a**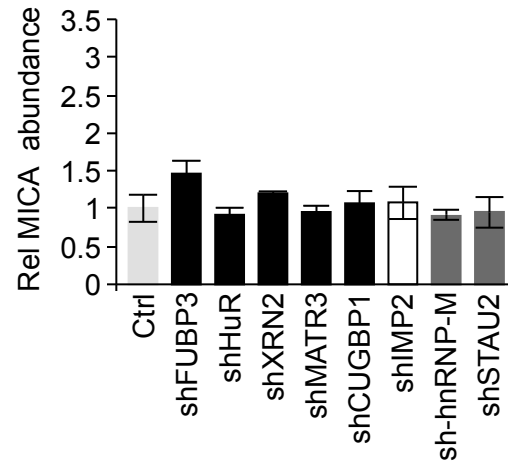**b**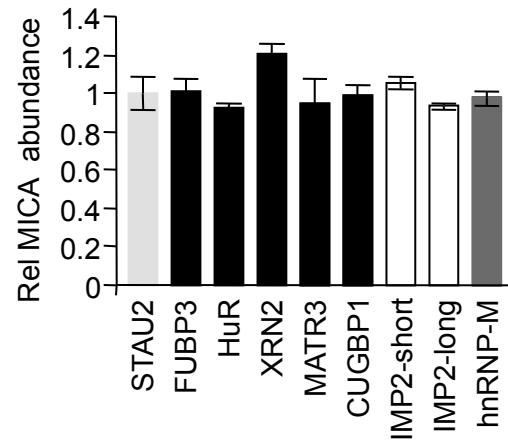**Supplementary figure 4. The identified RBPs do not affect the relative abundance of MICA mRNA.**

Relative mRNA abundance of MICA in the various shRNA-transduced (a) or RBP-transduced (b) RKO cells was evaluated by qRT-PCR. hGAPDH was used as a reference gene. Shown are mean $\pm$ SEM of triplicates. Data are representative of three independent experiments. (a) The abundance of MICA in cells transduced with a control-shRNA was set as 1. (b) The abundance of MICA in cells transduced with STAU2 was set as 1.

1 ACUCUACAGCCAGGCAGCUGGGAUUCAAUUCCCUGCCUGGAUCUCACGAGCACUUJCCCUCUUGGUGCCUCAGUUJCCUG  
81 ACCUAUGAAACAGAGAAAAUAAAAGCACUUAUUUAUJGUUGUUGGAGGCUGCAAAAUGUUAGUAGAU AUGAGGCGUUUGC  
161 AGCUGUACCAUAUU

**Supplementary figure 5. Analysis of RBP binding elements in the 3'UTRs of MICA**

The sequence of the 3' UTR of MICA. One AU-rich element (possible HuR binding regions) is highlighted in dark grey and white letters.

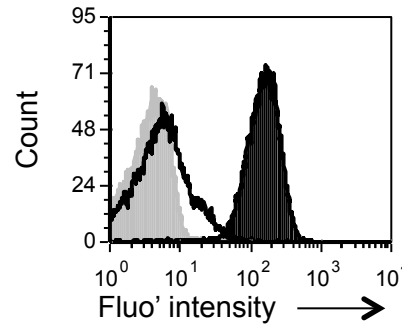

**Supplementary figure 6. MICA and MICB expression by HEK293T cells**

FACS analysis of the levels of MICA (filled black histogram) and MICB (empty black histogram) on HEK293T cells. Filled grey histogram represents background staining.

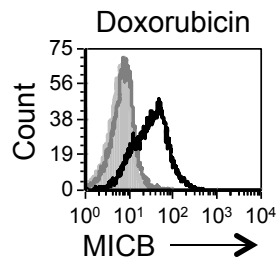

**Supplementary figure 7. Doxorubicin treatment induces MICB expression.**

HFF cells were treated with 2  $\mu\text{g/ml}$  of Doxorubicin for 48 hrs and then the levels of MICB were analyzed by FACS. The empty grey histogram represents MICB levels prior to Doxorubicin treatment, the black histogram represents MICB levels following Doxorubicin and the filled grey histogram represents background staining.

1 CCCAACUCCAAACAAUUCUGAUGAAAACA**AAAUCA**CAGCACCCACUAC**CAUACA**GACAGCACAAGGUGGCAGCAAGCAAU  
 81 UCGCCCCACACCCAGCCAGCUCCUUUCCUUUU**CAUCA**UCUCUUUCCACUCCUUUGCGUCAGGAGCAG**CAUCAU**  
 161 **CAGCAA**AUGCCUUUUCAAUUGCAGCAAUCCACUJAGCAGGGACAGGAGAAAAUUUUAUCCCAUGUUGACUGUCUUGACU  
 241 GUCACGGAACAGAUUCUUG**UUCUUU**GCUGGAC**CAUC**AAGGGUCAUGGCAGUGCCUGAACAUUGGCAGUCUAGGGUGAACAAU  
 321 CCCCUAACACAAGUU**UACUUG**UCUUUGAUUAUGACAGUAACAAAAUUGACAGCUUUCUAACUCACAGG**CAUA**GAGUGACC  
 401 UUUUAAUCAGAGCCAGGGAAGACACAUGAUUAAUGAUUUAGCUCCUC**CAUA**CCUCGAA**CAUC**AGUUGGGAUCCCUCCU  
 481 CCAGCCAAGAUGAUCC**UUCUUA**GAGAAGGCUCAGCCUUGGAAGCA**AACUUAUAAAUCAUA**UUCUCAUGGCUUUGUUAAC  
 561 UUAUUUCAAGUGAUGGU**CAUUCAU**UACUAUG**AACUUG**GAUAUJCAAGCCUUUGGAUGGCUAUGGAGAGGGGCUUGAAAU  
 641 GUGUACAGGUGUCAC**CAUC**AUUUCUAGUAUAUUAGGAAACUGGGAUGGGAGGUUGAUUUGCUCUCUAAACUCCUCUAG  
 721 UUGGCAAGUCUCA**CAUAUUCAUC**AGCAGGAGUGGGAGGGGAAAACUAGAAAGAUGAA**AACUUU**U**CAUU**UUUCUGA  
 801 UGGGUUCAUGUCUCUGAUUGGGUCAGCUGGCUUCCUAGCCUAAGCUGGGAUCUGAAUACCCCUUCUCUGUAGCUCUAGU  
 881 GAGCCUCC**CAUU**UAGAUUAAAGAUUGCUUUAUCCAGCAGUC**AAUJAA**CUCUCCAGUUAUCAGUACUCCACAAUUGGCC  
 961 AGGGCAA**CAUJAA**UUGGAGUU**CAUA**CUGAUGCCCUGAGGCACUG**AAAAAAAAAAAA**UCCCAAAGUGCCUUCUGAGCUGU  
 1041 CUAAAAGUUA**CAUU**GUGCUUGGUAGAUUUAGUGUUAAGUGUGCAGUAUAAUUUUCU**AAUUUAU**JUUCUCA**AUCUUU**UAGC  
 1121 ACAUGUGUAAGACACUGUGCAAUUUUUUGAAAAUAGAGCAA**UACUUU**UUGUGGAAUACUAGCUAACUAAUUCUGU**CAUU**  
 1201 AAACU**CAUA**UUUUGAAAAUAUUCAGACAAUGUUGAA

**Supplementary figure 8. Analysis of putative RBP binding elements in the 3'UTR of CASQ2**

The sequence of the 3' UTR of CASQ2. RBP binding elements are highlighted. One AU-rich element (possible HuR binding regions) is highlighted in dark grey and white letters. MATR3 binding sequences are marked in red. IGF2BP2 binding sequences are marked in blue.





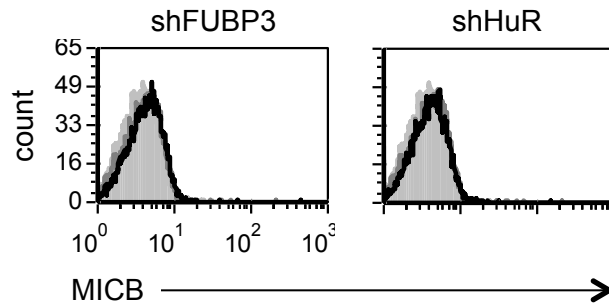

**Supplementary figure 10. KD of FUBP3 and of HuR does not effect MICB on untreated HFF cells.** HFF cells were transduced with shRNAs against FUBP3, HuR or a control vector and MICB levels were subsequently analyzed by FACS. The empty grey histogram represents

Supplementary Table 1. Primers for amplification of 3'UTRs

| Gene  | Orientation | Sequence (5'-3')              |
|-------|-------------|-------------------------------|
| TAF6  | Fw          | TGCTCCACCTGCCAGCCC            |
|       | Rv          | TCAGAACTTACAAACCAAACCTTTTA    |
| CASQ2 | Fw          | CCCAACTCCAAACAATTCTGATG       |
|       | Rv          | TTCAACATTGTCTGAATATTTTC       |
| MICA  | Fw          | ACTCTACAGCCAGGCAGCTGGGATTC    |
|       | Rv          | AATATGGTACAGCTGCAAACGCCTC     |
| MICB  | Fw          | ACTCTACAGCCAGGCGGCCAGG        |
|       | Rv          | AGAGTAAACATTTACGGTATAAATTATGC |

Supplementary Table 2. Primers for amplification of RBPs and mutagenesis

|         | Orientation | Sequence (5'-3')                                              |
|---------|-------------|---------------------------------------------------------------|
| FUBP3   | Fw          | ATGGCGGAGCTGGTGCAGG                                           |
|         | Rv          | CTACTGCTCCTGGCTGTGGG                                          |
| HuR     | Fw          | ATGTCTAATGGTTATGAAGACCACATG                                   |
|         | Rv          | TTTATTTGTGGGACTTGTTGGTTTT                                     |
| XRN2    | Fw          | ATGGGAGTCCCGGCGTTCTT                                          |
|         | Rv          | TTAATTCCAATTGTATCTTCCTGAG                                     |
| MATR3   | Fw          | ATGTCCAAGTCATTCCAGCAGT                                        |
|         | Rv          | TTAAGTTTCCTTCTTCTGTCTGC                                       |
| CUGBP1  | Fw          | ATGAACGGCACCCCTGGACCA                                         |
|         | Rv          | TCAGTAGGGCTTGCTGTCATTC                                        |
| IGF2BP2 | Fw          | ATGATGAACAAGCTTTACATCGG                                       |
|         | Rv          | TTCAC TTGCTGCGCTGTGAGG                                        |
| STAU2   | Fw          | ATGCTTCAAATAAATCAGATGTTC                                      |
|         | Rv          | TCATACCTGAAAGCCTTGAATCC                                       |
| hnRNP-M | Fw          | ATGGCGGCAGGGGTCGAAG                                           |
|         | Rv          | TTAAGCGTTTCTATCAATTCTGAAC                                     |
| GUmut   | Fw          | GGTATCATTATTTCTGTTGTTGTTGTTGTTG<br>TTGTTGTTGTTGTTGTTGAGACAGAG |
|         | Rv          | CTCTGTCTCAACAACAACAACAACAACA<br>ACAACAACAACAGAAATAATGATACC    |

Supplementary Table 3. Primers for the detection of the transcripts in qRT-PCR

|         | Orientation | Sequence (5'-3')         |
|---------|-------------|--------------------------|
| MICB    | Fw          | CTGCTGTTTCTGGCCGTC       |
|         | Rv          | ACAGATCCATCCTGGGACAG     |
| MICA    | Fw          | ATCTTCCCTTTTGCACCTCC     |
|         | Rv          | AACCCTGACTGCACAGATCC     |
| FUBP3   | Fw          | GGAGCAGACAAGCCTCTTCGTA   |
|         | Rv          | CCATTTCGAGAGTTGAAATCGCCG |
| HuR     | Fw          | AGCAGCATTGGTGAAGTTGA     |
|         | Rv          | GCGGTCACGTAGTTCACAAA     |
| XRN2    | Fw          | GCAAGTACCCGTCCATCATAG    |
|         | Rv          | TGGATTAGGTTTACTGGCATCA   |
| MATR3   | Fw          | GGGGGATTGTGGGAGTCT       |
|         | Rv          | TTCAAGCTGAGAACCAGCAG     |
| CUGBP1  | Fw          | CATCTGTGTGGGGAAACCTT     |
|         | Rv          | GTGTTGAGGTTCCAGAGGA      |
| IGF2BP2 | Fw          | AAAGTGGAATTGCATGGGAA     |
|         | Rv          | CAGGTGAGGAGGGATGTTTC     |
| hnRNP-M | Fw          | CAAAATGGAGGAAGAGAGCG     |
|         | Rv          | TTCTCATTCTGAGCAGGTCG     |
| STAU2   | Fw          | GCCATTAGATCCAAAGCCAT     |
|         | Rv          | CTTAGGCACTGGGCAATGAT     |
| GAPDH   | Fw          | AAGGTGAAGGTCCGAGTCAA     |
|         | Rv          | AATGAAGGGGTCATTGATGG     |
